# Supplementary material for: A systematic review on the effectiveness of complementary and alternative medicine for chronic non-specific low-back pain
Source: Springer Nature journal article supplement (doi:10.1007/s00586-010-1356-3), 2010-03-13
Supplement: MOESM3 [file 8601564]

## Appendix 3

## Spinal manipulative therapy

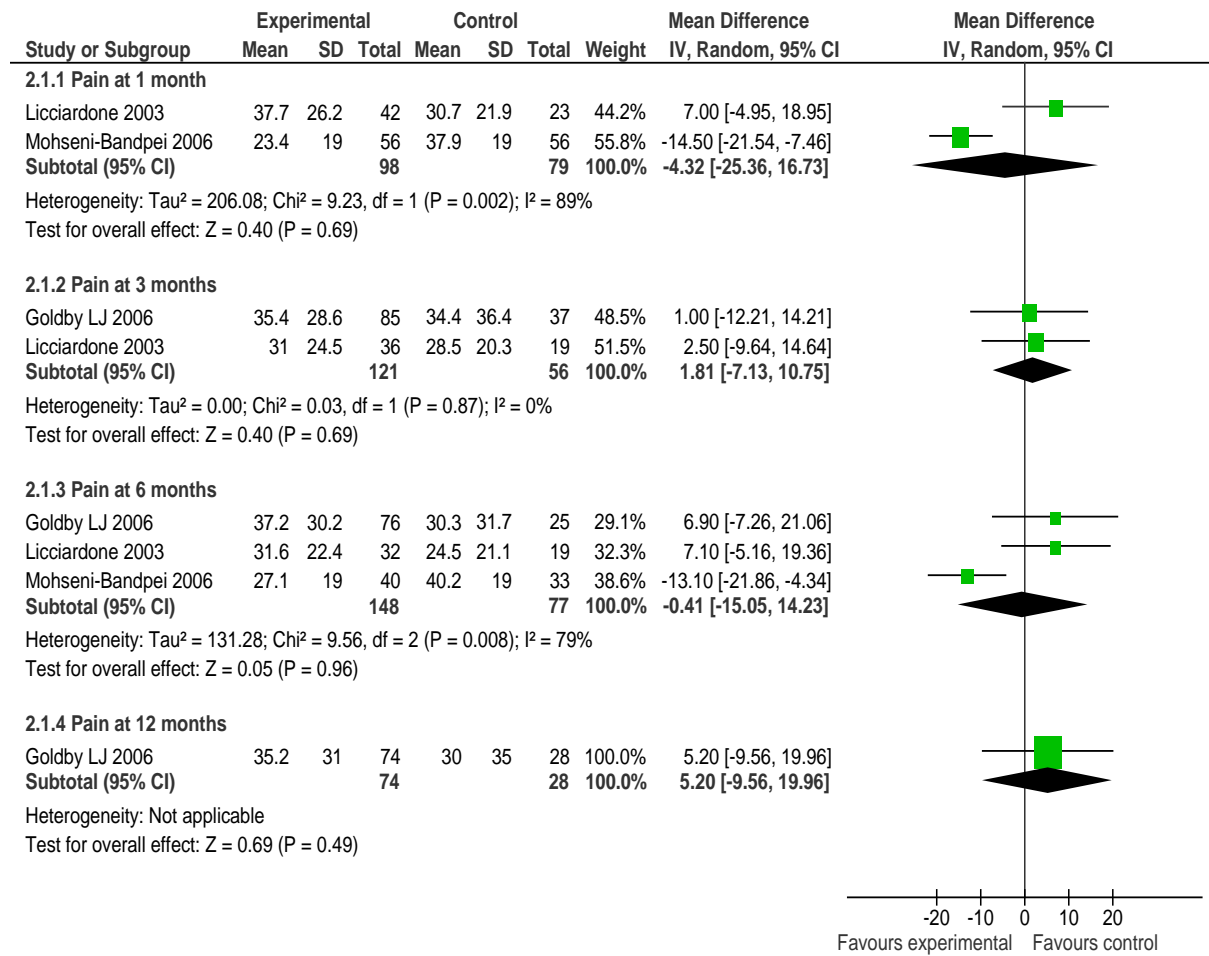Fig.1 Spinal manipulative therapy *versus* sham, placebo, or passive modalities for the outcome, pain.

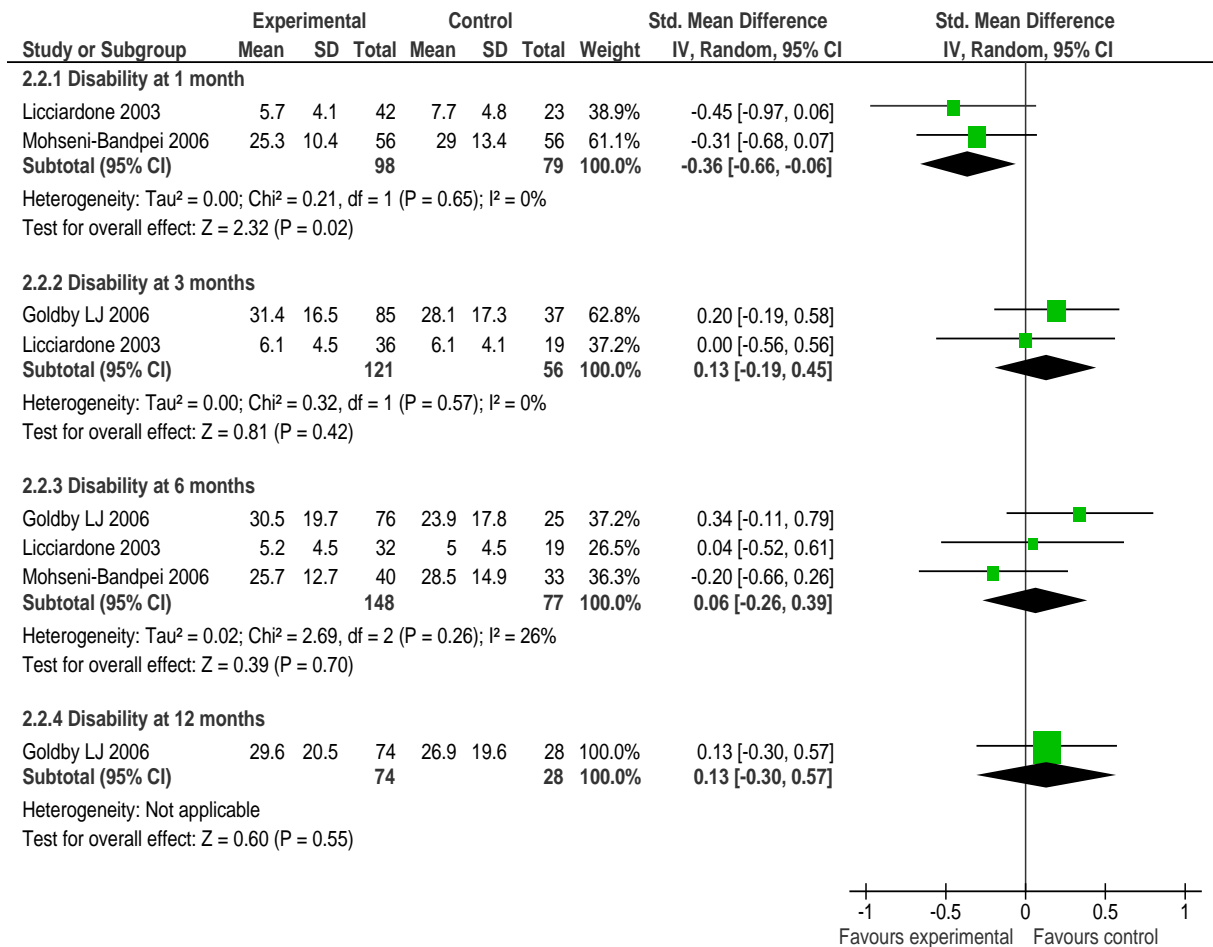

Fig. 2 Spinal manipulative therapy *versus* sham, placebo, or passive modalities for the outcome, functional status.

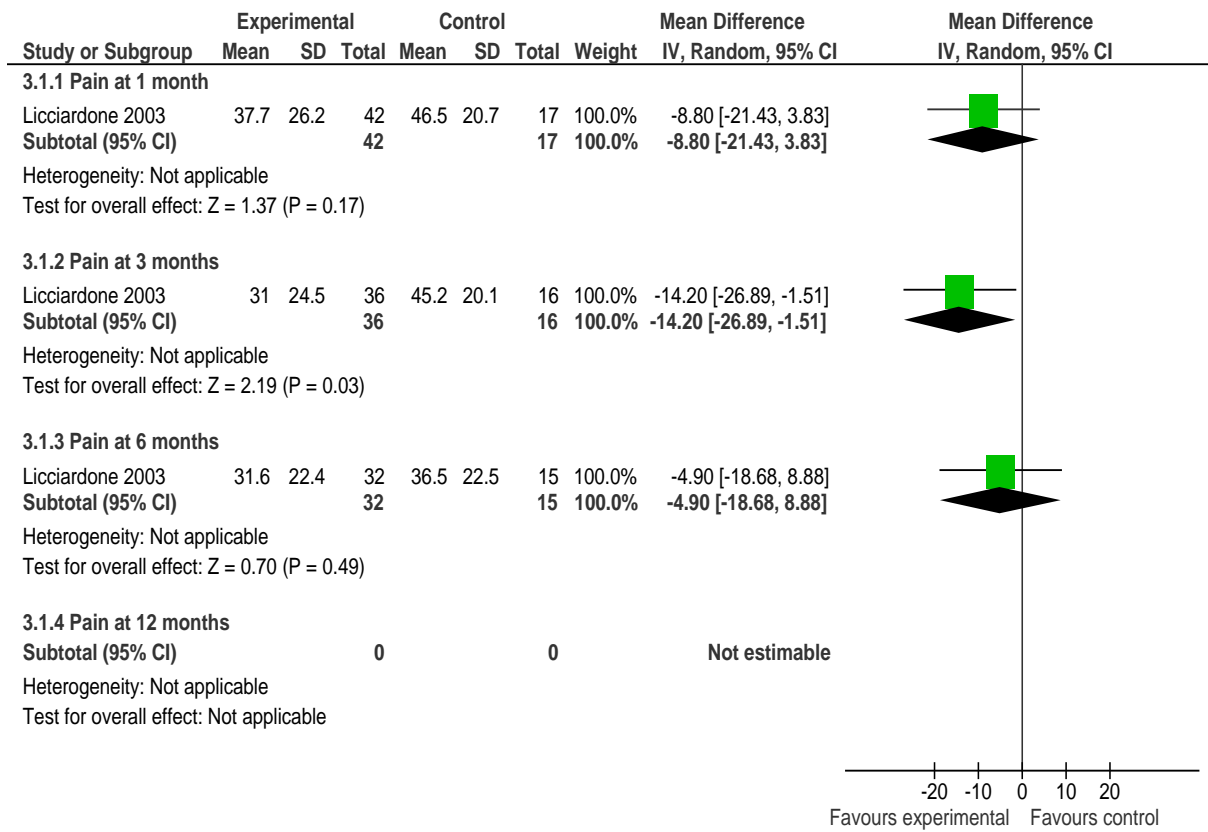

Fig. 3 Spinal manipulative therapy plus an intervention *versus* the intervention alone for the outcome, pain.

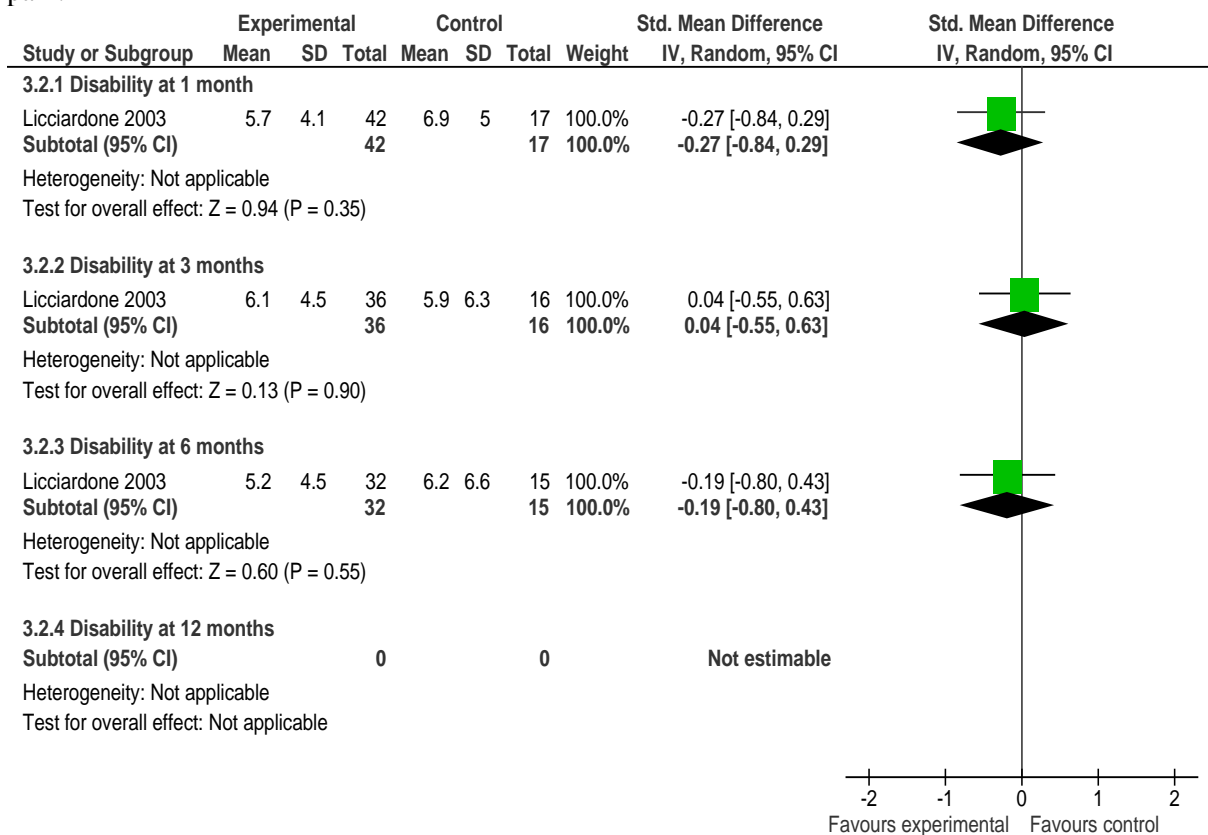

Fig. 4. Spinal manipulative therapy plus an intervention *versus* the intervention alone for the outcome, functional status.

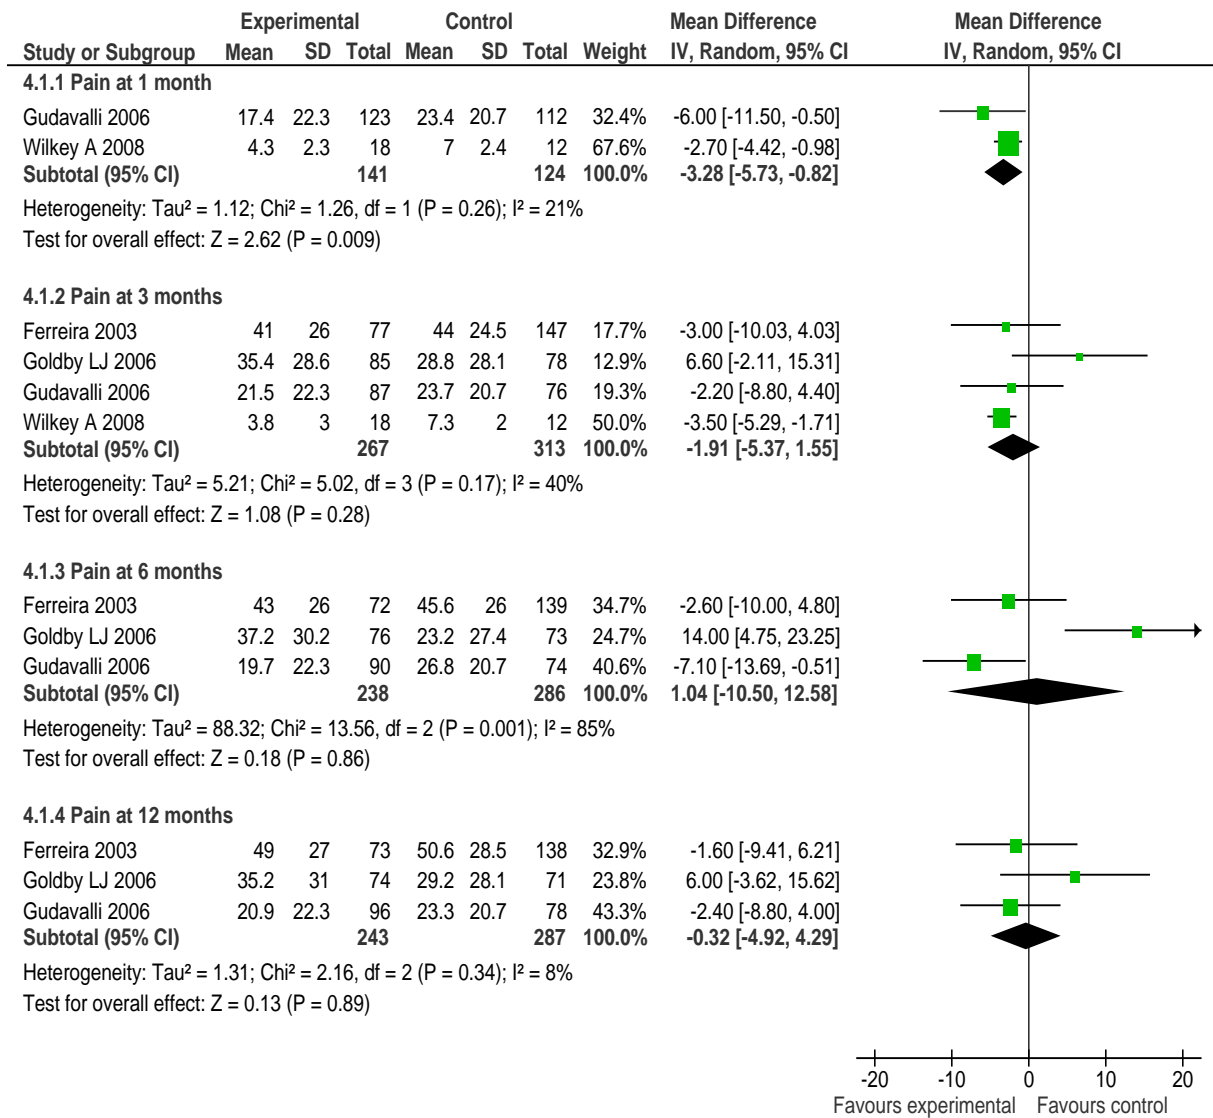

Fig. 5. Spinal manipulative therapy *versus* any other intervention for the outcome, pain.

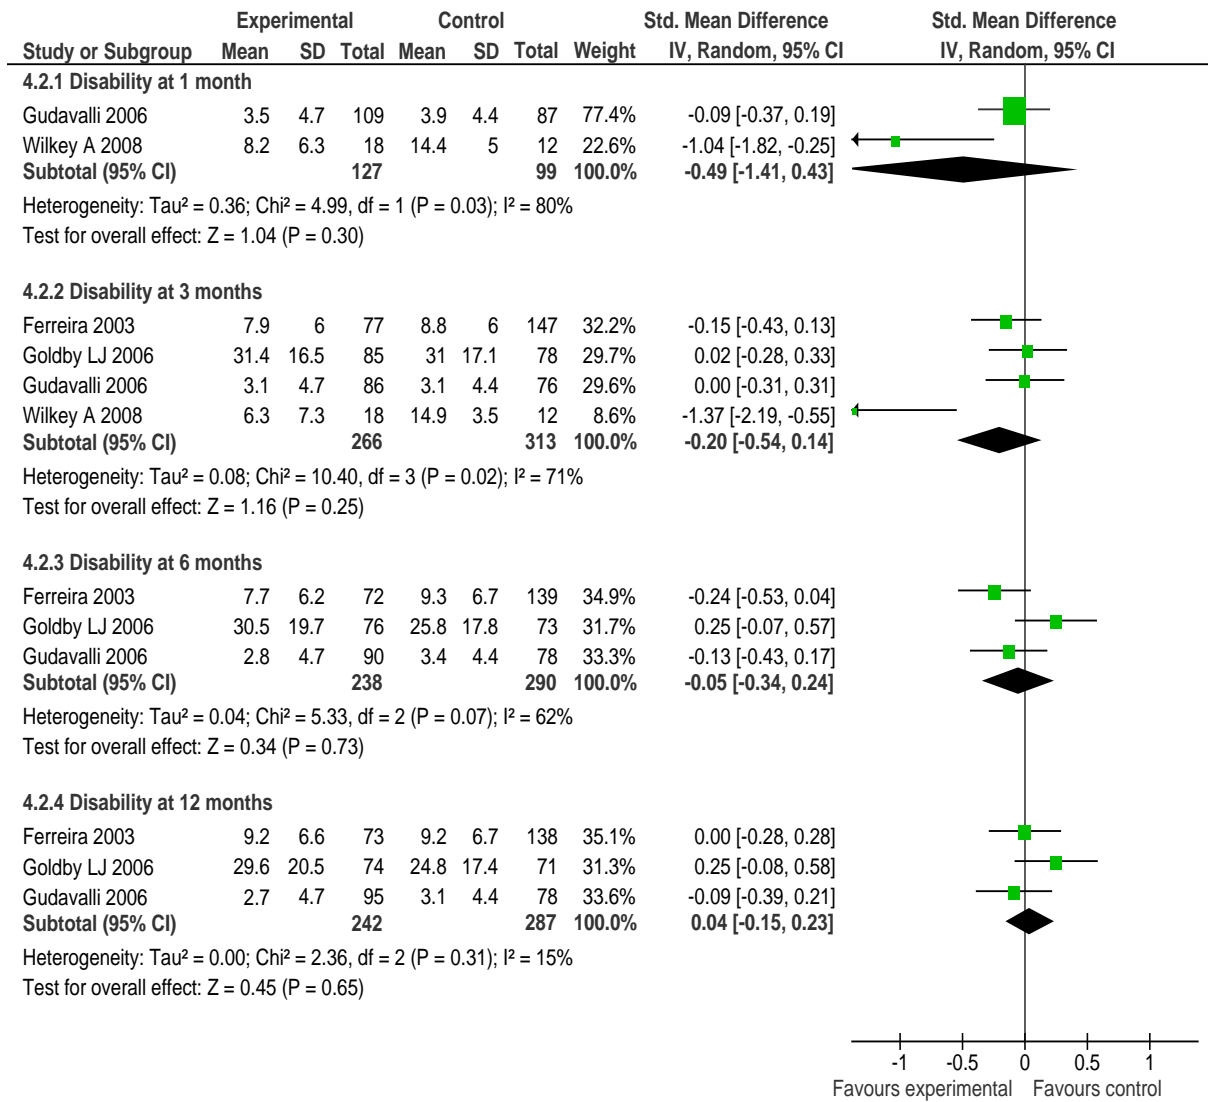

Fig. 6. Spinal manipulative therapy *versus* other intervention for the outcome, functional status.

**Acupuncture**

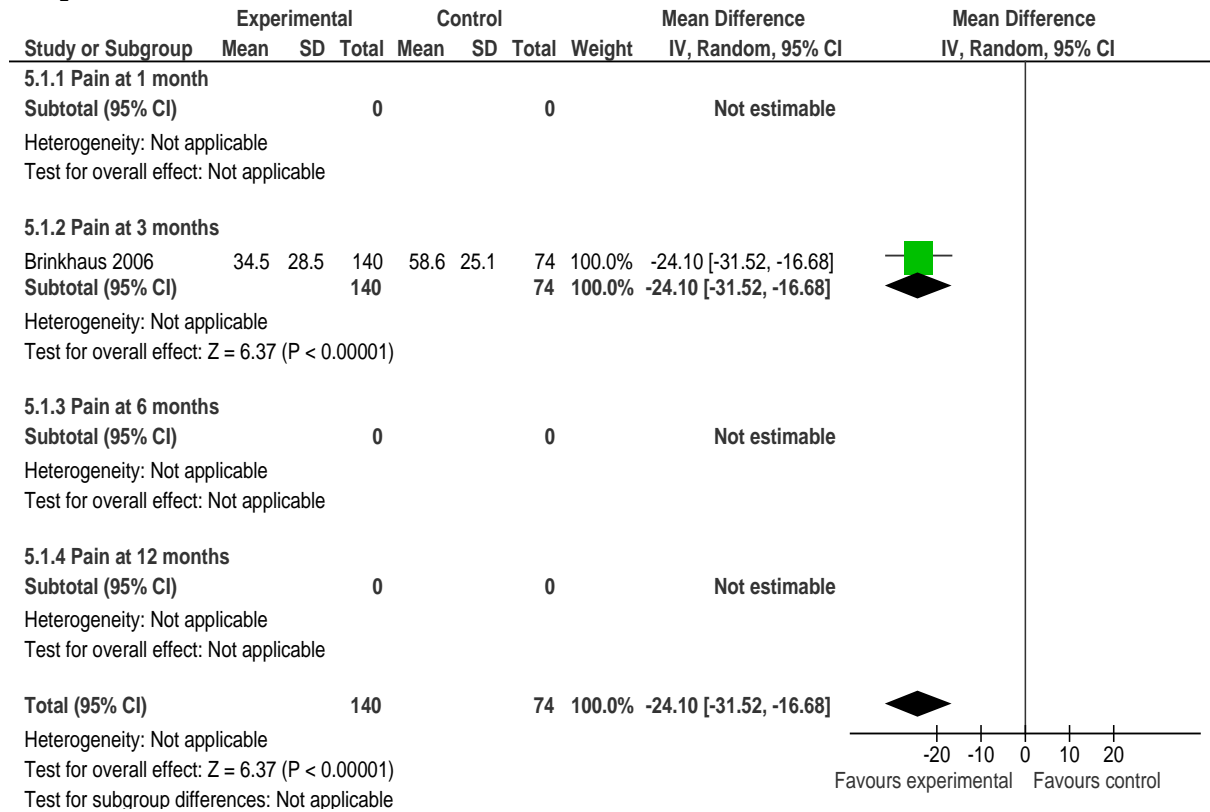

Fig. 7. Acupuncture *versus* no treatment or waiting list control for the outcome, pain.

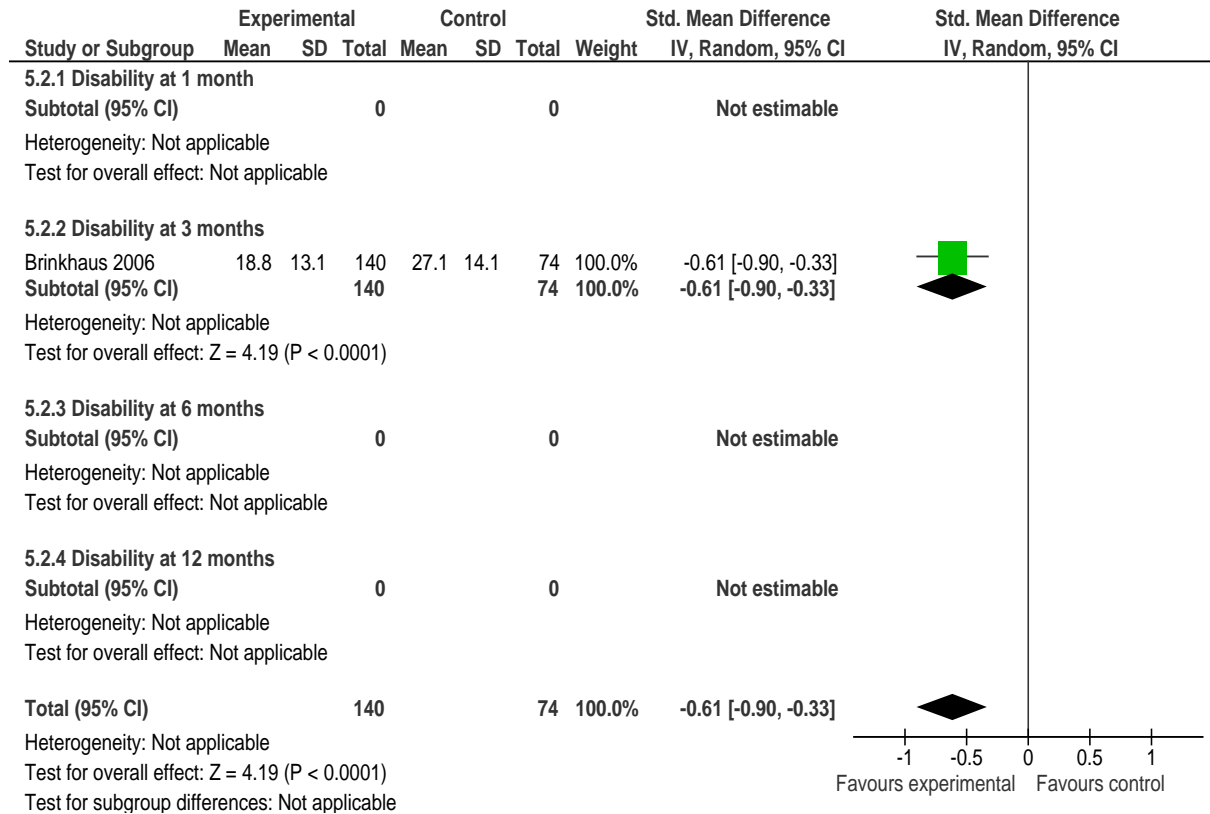

Fig. 8. Acupuncture *versus* no treatment or waiting list control for the outcome, functional status.

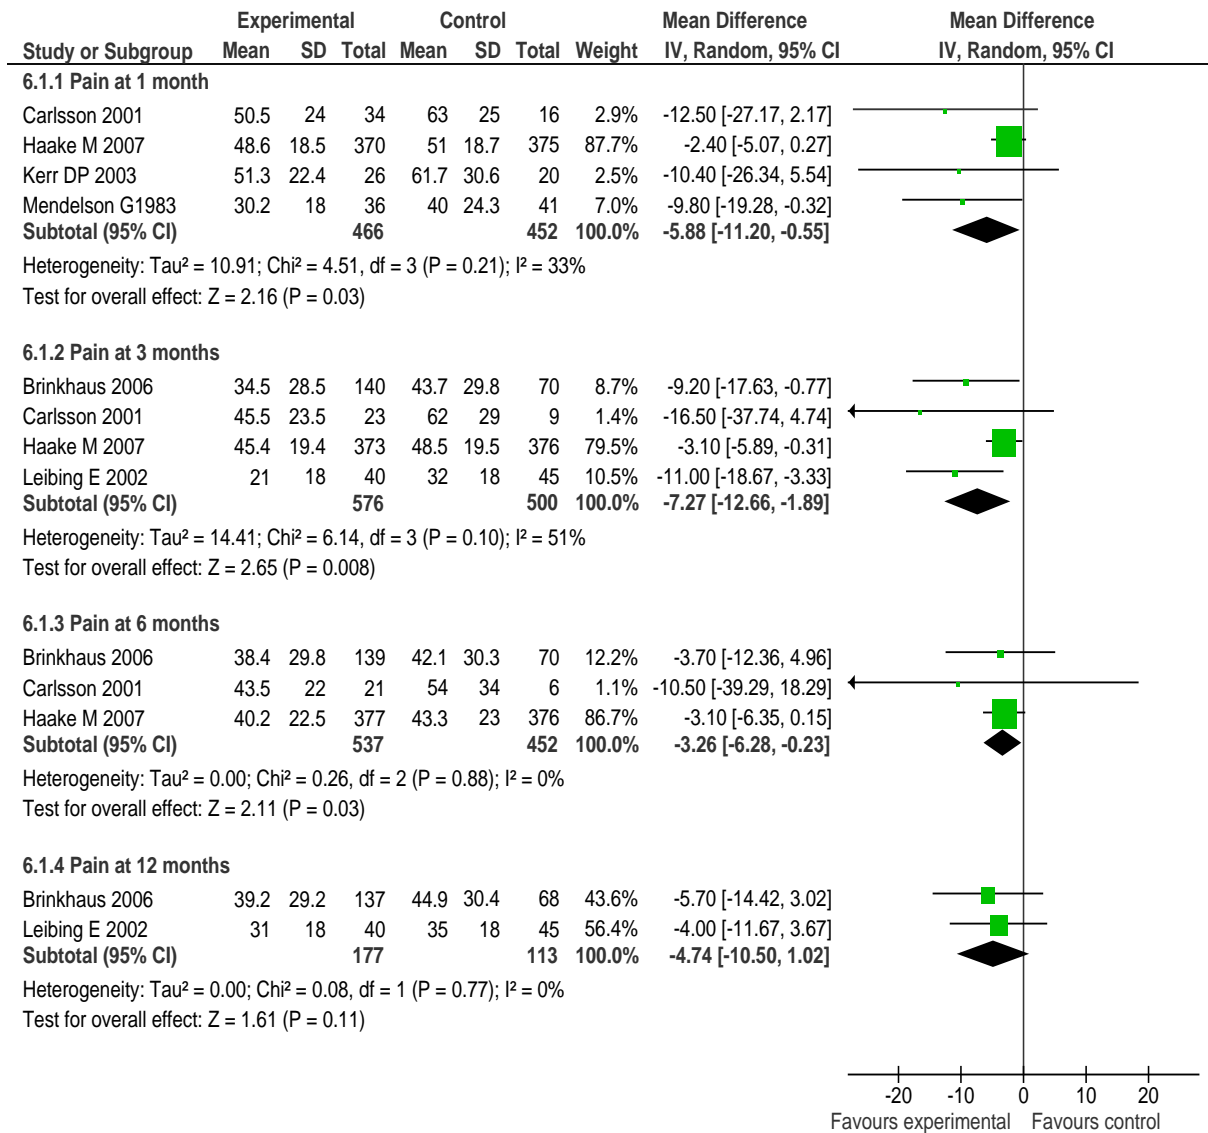

Fig. 9. Acupuncture *versus* sham, placebo or passive modalities for the outcome, pain.

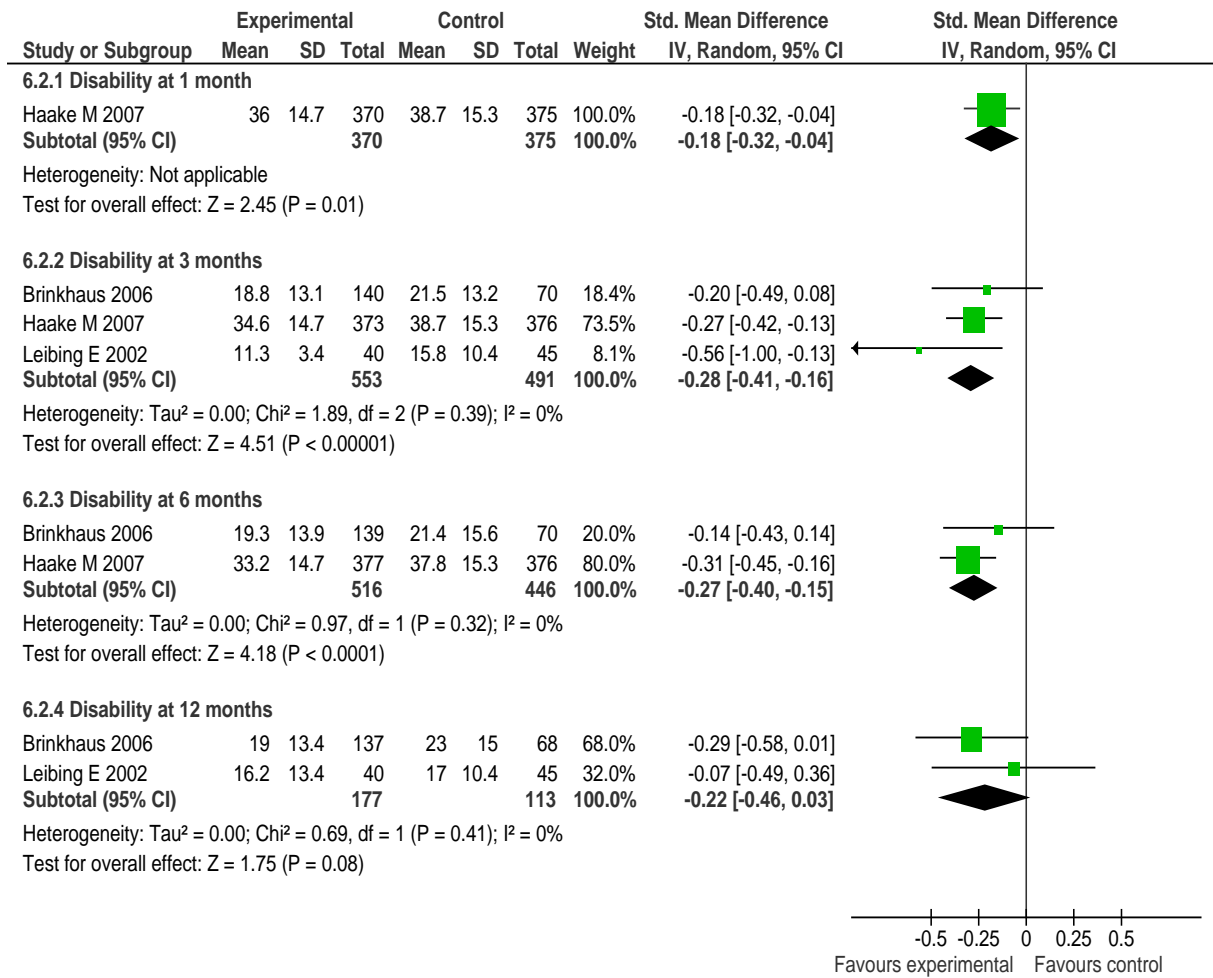

Fig. 10. Acupuncture *versus* sham, placebo or passive modalities for the outcome, functional status.



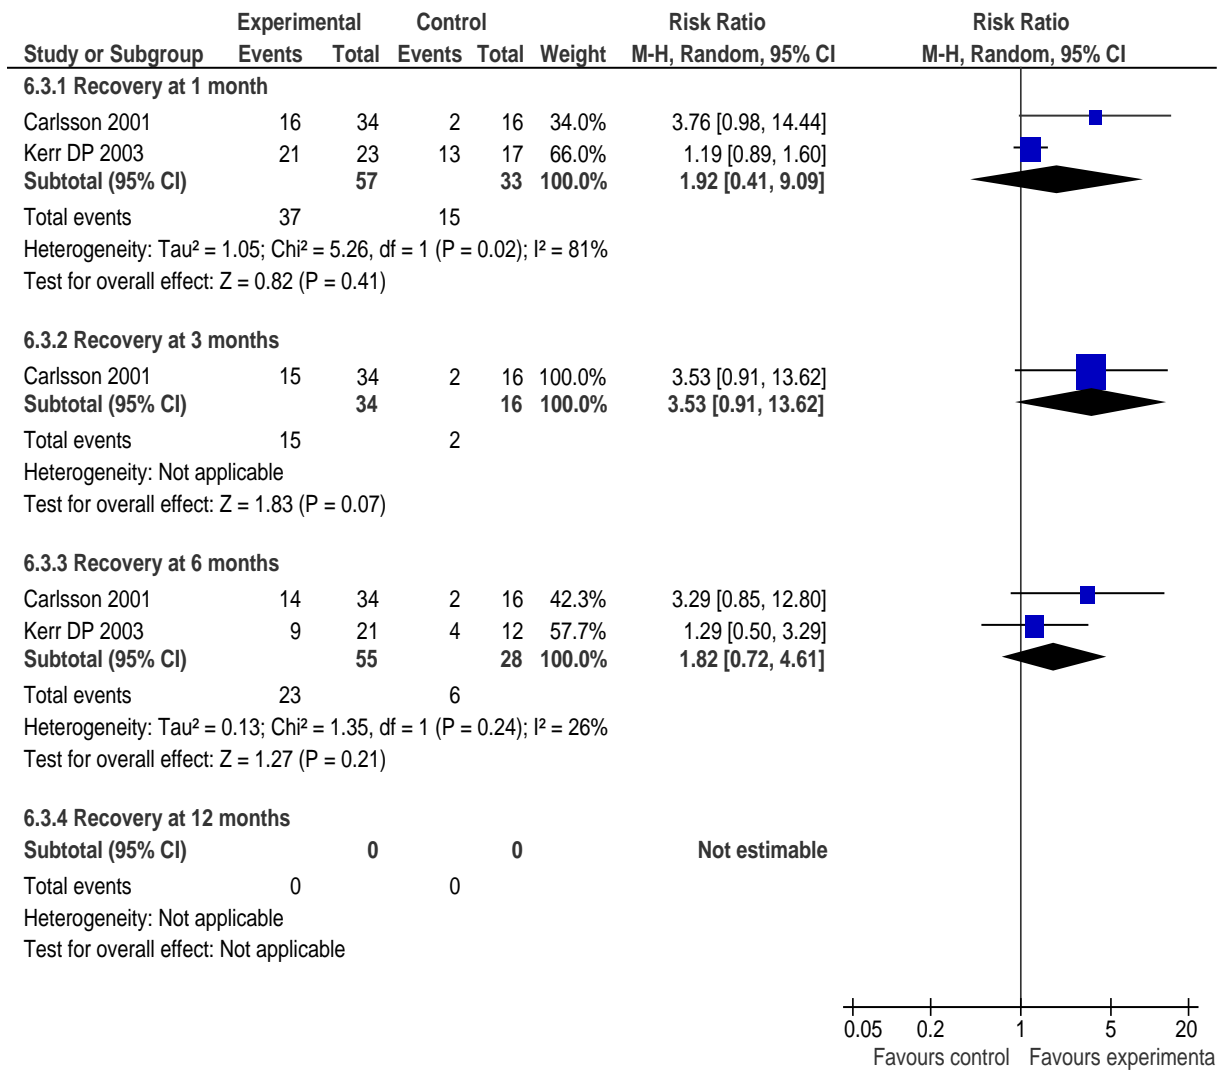

Fig. 11. Acupuncture *versus* sham, placebo or passive modalities for the outcome, recovery.

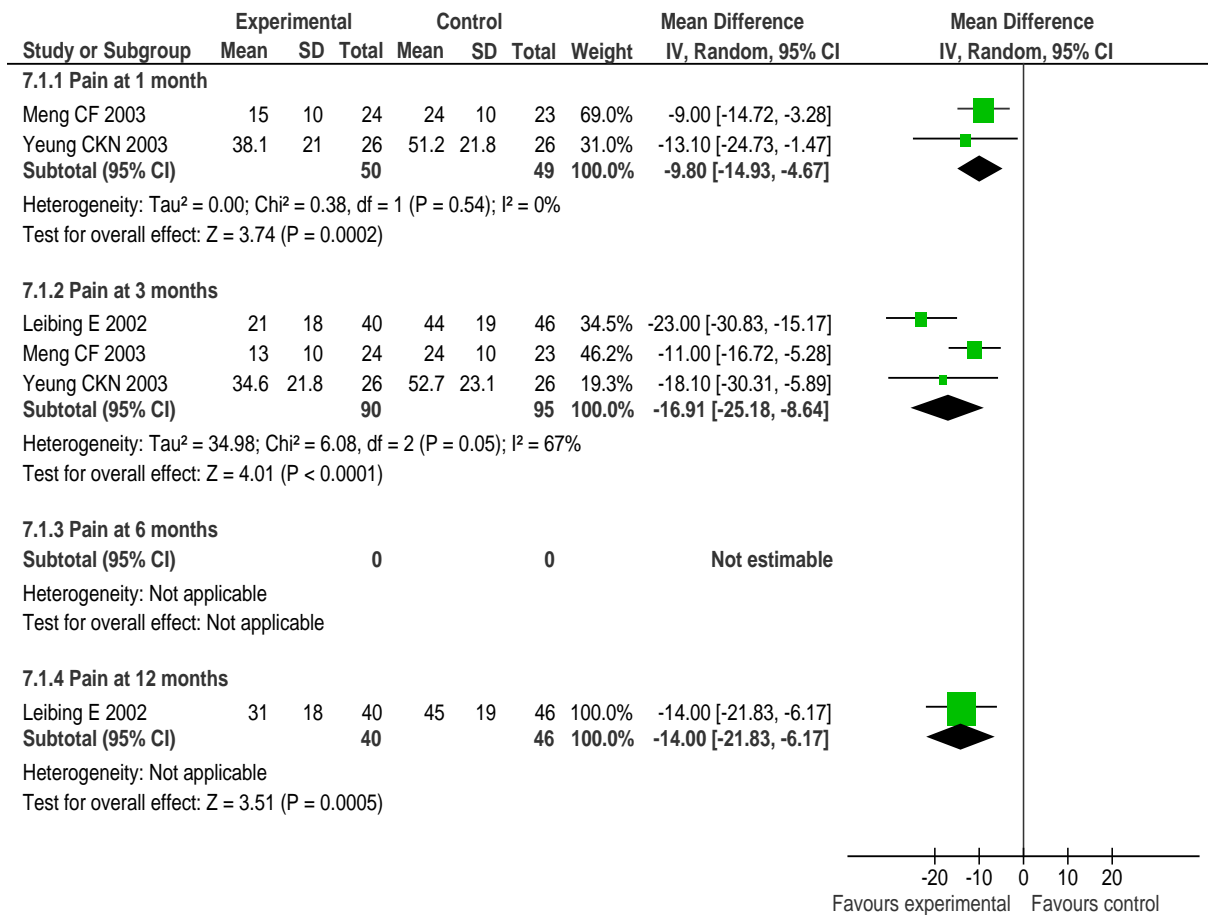

Fig. 12. Acupuncture plus an intervention *versus* the intervention alone for the outcome, pain.

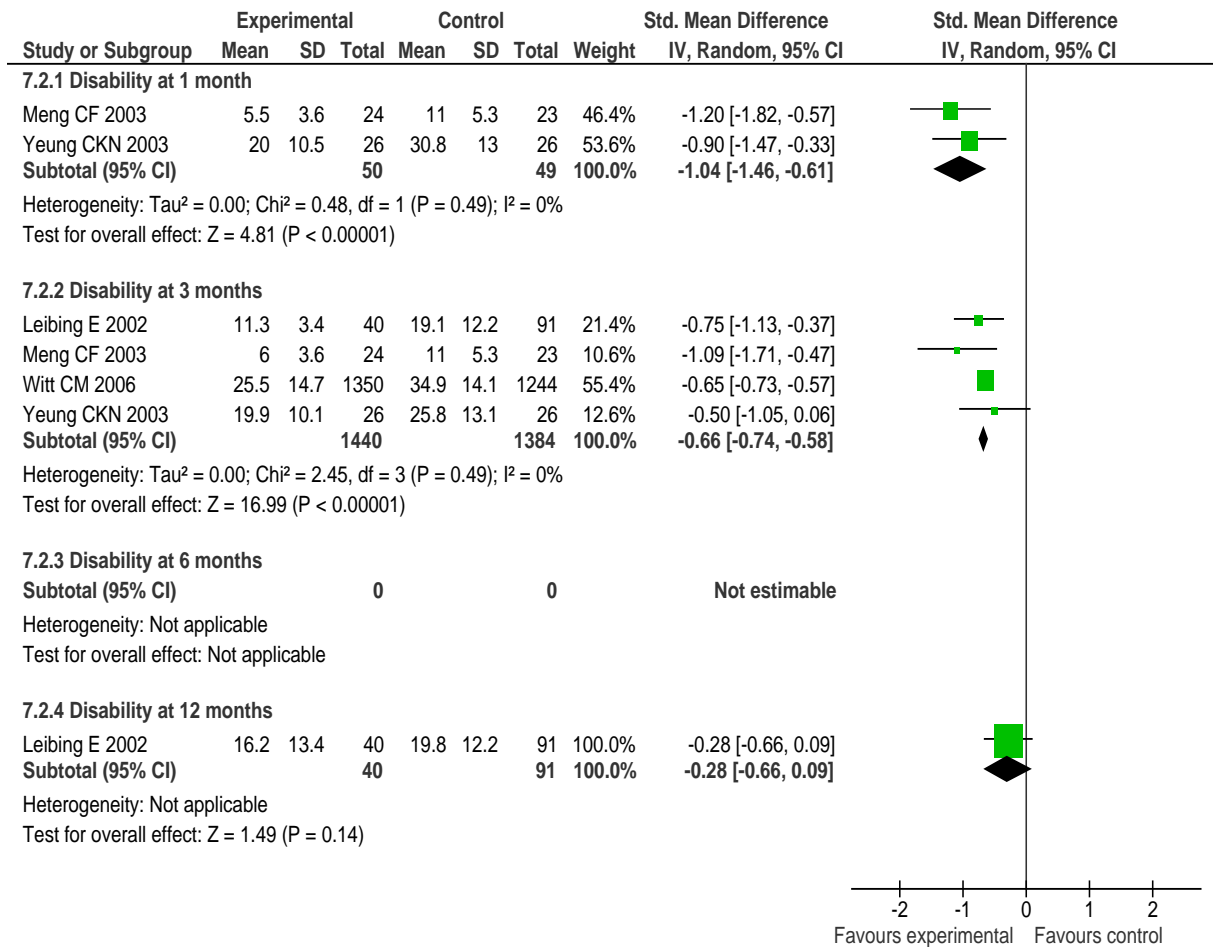

Fig. 13. Acupuncture plus an intervention *versus* the intervention alone for the outcome, functional status.

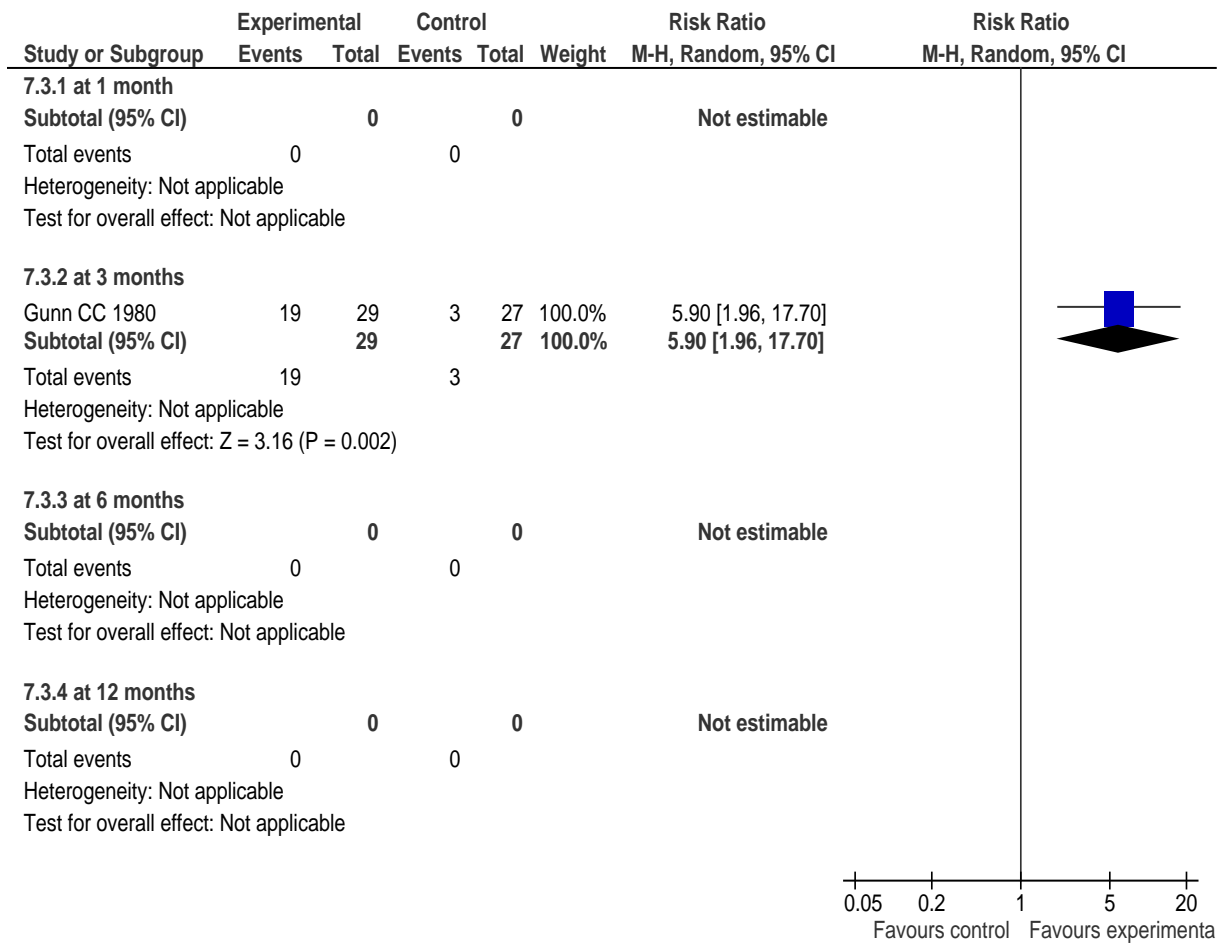

Fig. 14. Acupuncture plus an intervention *versus* the intervention alone for the outcome, recovery.

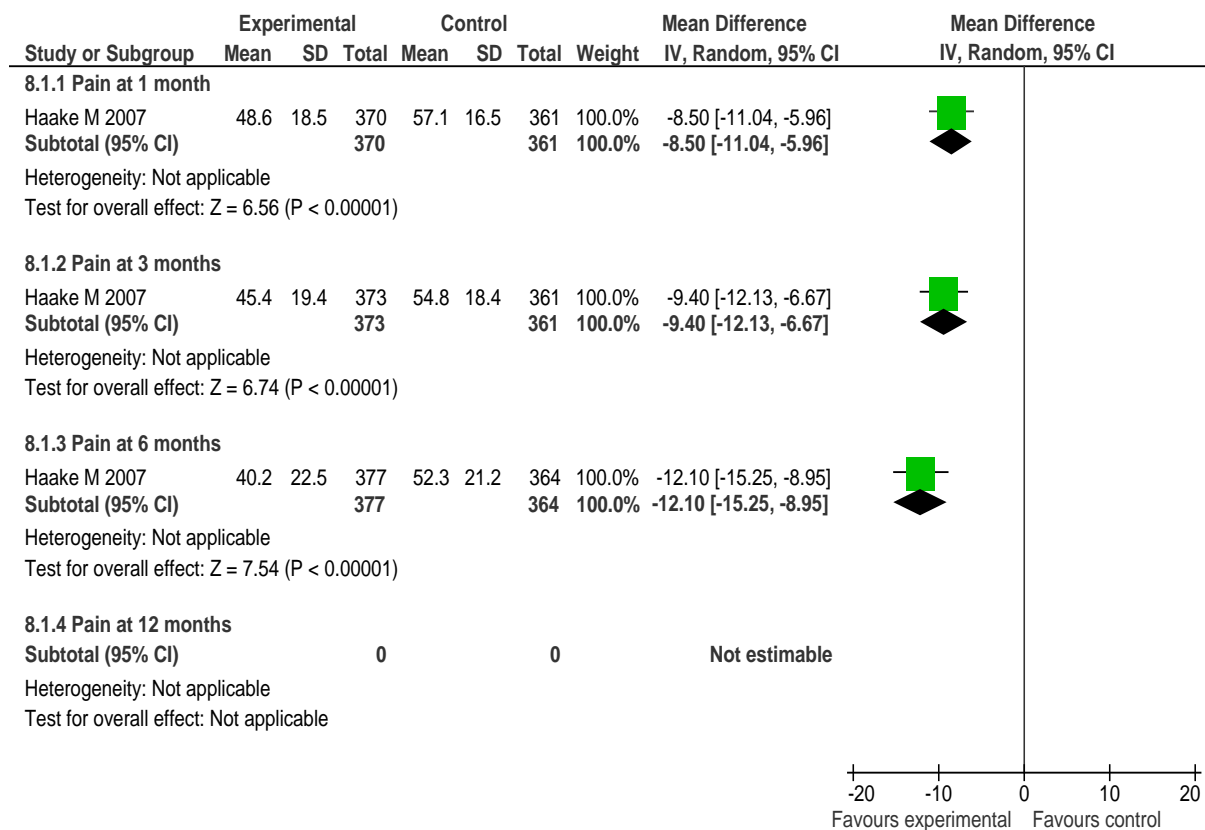

Fig. 15. Acupuncture *versus* any other intervention for the outcome, pain.

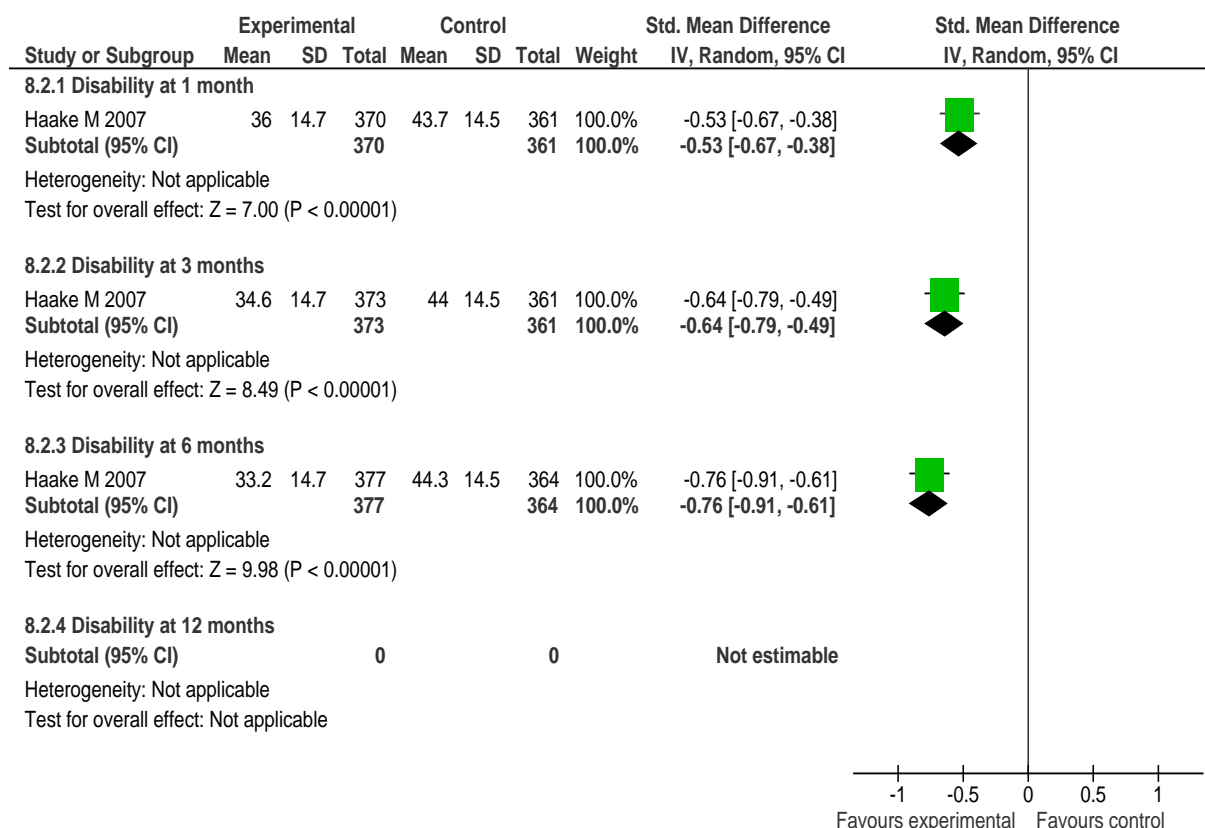

Fig. 16. Acupuncture *versus* any other intervention for the outcome, functional status.

**Herbal medicine**

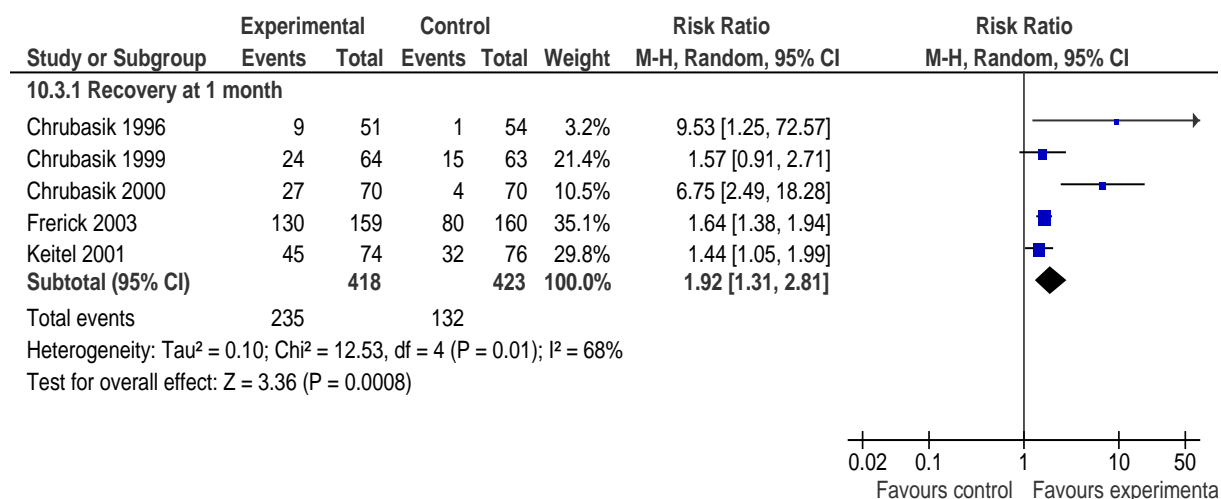

Fig. 17. Herbal medicine *versus* sham, placebo or passive modalities for the outcome, recovery.

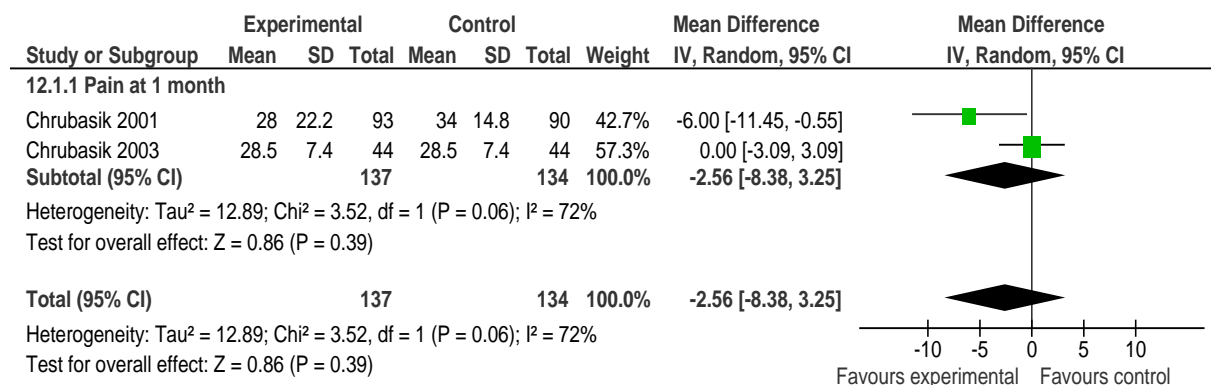

Fig. 18. Herbal medicine *versus* any other intervention for the outcome, pain.

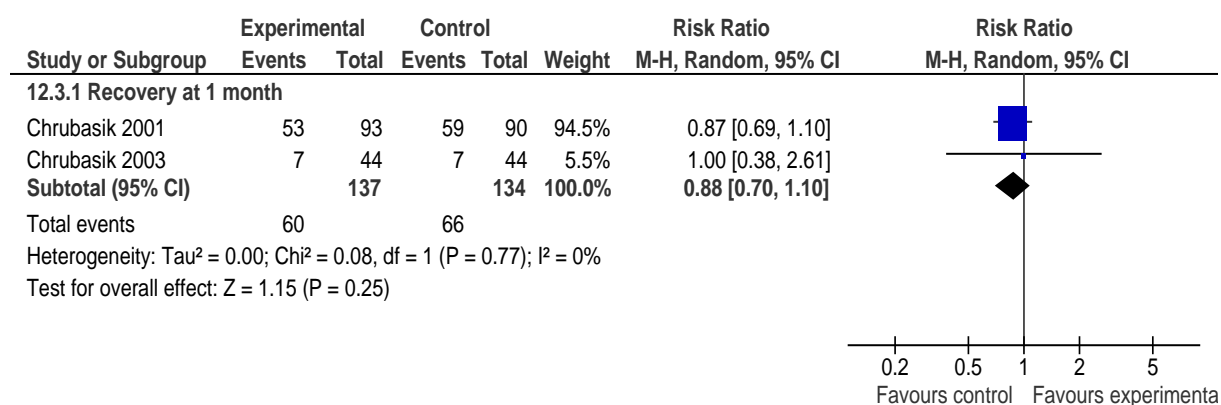

Fig. 19. Herbal medicine *versus* any other intervention for the outcome, recovery.
